# Supplementary material for: Comparative chloroplast genomes and phylogenetic analysis of the Phlegmariurus (Lycopodiaceae) from China and neighboring regions
Source: Front Plant Sci. 2025 Jul 8;16:1543431. doi: 10.3389/fpls.2025.1543431 (PMC12279849; doi:10.3389/fpls.2025.1543431)
Supplement: Supplementary file 14 [file DataSheet2.xlsx]

## Sheet: Sheet1
Table S2 Nucleotide diversity (Pi) of the 42 Phlegmariurus chloroplast genomes.
Window	Midpoint	Pi
1-600	300	0.02588
201-800	500	0.01856
401-1000	700	0.01765
601-1200	900	0.01667
801-1400	1100	0.0209
1001-1600	1300	0.02449
1201-1800	1500	0.02585
1401-2000	1700	0.02051
1601-2200	1900	0.01456
1801-2400	2100	0.01289
2001-2600	2300	0.01723
2201-2800	2500	0.02268
2401-3000	2700	0.02202
2601-3200	2900	0.01431
2801-3400	3100	0.00911
3001-3600	3300	0.01608
3201-3800	3500	0.02241
3401-4000	3700	0.02778
3601-4200	3900	0.02612
3801-4400	4100	0.02816
4001-4600	4300	0.02259
4201-4800	4500	0.01647
4401-5000	4700	0.01504
4601-5200	4900	0.01803
4801-5400	5100	0.01791
5001-5600	5300	0.01696
5201-5800	5500	0.01798
5401-6000	5700	0.02392
5601-6200	5900	0.02063
5801-6400	6100	0.01566
6001-6600	6300	0.01383
6201-6800	6500	0.02102
6401-7000	6700	0.02065
6601-7200	6900	0.01672
6801-7400	7100	0.00786
7001-7600	7300	0.01146
7201-7800	7500	0.01449
7401-8000	7700	0.0149
7601-8200	7900	0.012
7801-8400	8100	0.02085
8001-8600	8300	0.02703
8201-8800	8500	0.02715
8401-9000	8700	0.01529
8601-9200	8900	0.01278
8801-9400	9100	0.01668
9001-9600	9300	0.02206
9201-9800	9500	0.01908
9401-10000	9700	0.01721
9601-10200	9900	0.01239
9801-10400	10100	0.01221
10001-10600	10300	0.01098
10201-10800	10500	0.02387
10401-11000	10700	0.02864
10601-11200	10900	0.03298
10801-11400	11100	0.02379
11001-11600	11300	0.02001
11201-11800	11500	0.01298
11401-12000	11700	0.01112
11601-12200	11900	0.01048
11801-12400	12100	0.01888
12001-12600	12300	0.01471
12201-12800	12500	0.01253
12401-13000	12700	0.00477
12601-13200	12900	0.0063
12801-13400	13100	0.00613
13001-13600	13300	0.00834
13201-13800	13500	0.00812
13401-14000	13700	0.01113
13601-14200	13900	0.01509
13801-14400	14100	0.03208
14001-14600	14300	0.0405
14201-14800	14500	0.04747
14401-15000	14700	0.0312
14601-15200	14900	0.02303
14801-15400	15100	0.01792
15001-15600	15300	0.0225
15201-15800	15500	0.0226
15401-16000	15700	0.01474
15601-16200	15900	0.01751
15801-16400	16100	0.01851
16001-16600	16300	0.02362
16201-16800	16500	0.01909
16401-17000	16700	0.01381
16601-17200	16900	0.01559
16801-17400	17100	0.01455
17001-17600	17300	0.01642
17201-17800	17500	0.02881
17401-18000	17700	0.04187
17601-18200	17900	0.05607
17801-18400	18100	0.04085
18001-18600	18300	0.0325
18201-18800	18500	0.0249
18401-19000	18700	0.02409
18601-19200	18900	0.01814
18801-19400	19100	0.01568
19001-19600	19300	0.01992
19201-19800	19500	0.02179
19401-20000	19700	0.03385
19601-20200	19900	0.03355
19801-20400	20100	0.03509
20001-20600	20300	0.02958
20201-20800	20500	0.02497
20401-21000	20700	0.0234
20601-21200	20900	0.02579
20801-21400	21100	0.03405
21001-21600	21300	0.03029
21201-21800	21500	0.01454
21401-22000	21700	0.00679
21601-22200	21900	0.01297
21801-22400	22100	0.01617
22001-22600	22300	0.02275
22201-22800	22500	0.0256
22401-23000	22700	0.02991
22601-23200	22900	0.02782
22801-23400	23100	0.02516
23001-23600	23300	0.02534
23201-23800	23500	0.01876
23401-24000	23700	0.0136
23601-24200	23900	0.01159
23801-24400	24100	0.01114
24001-24600	24300	0.01302
24201-24800	24500	0.01924
24401-25000	24700	0.02501
24601-25200	24900	0.02175
24801-25400	25100	0.01575
25001-25600	25300	0.01312
25201-25800	25500	0.0219
25401-26000	25700	0.02596
25601-26200	25900	0.02803
25801-26400	26100	0.02446
26001-26600	26300	0.02277
26201-26800	26500	0.02283
26401-27000	26700	0.01996
26601-27200	26900	0.0174
26801-27400	27100	0.01671
27001-27600	27300	0.02077
27201-27800	27500	0.01925
27401-28000	27700	0.01783
27601-28200	27900	0.02002
27801-28400	28100	0.01921
28001-28600	28300	0.01533
28201-28800	28500	0.00924
28401-29000	28700	0.00796
28601-29200	28900	0.01681
28801-29400	29100	0.02052
29001-29600	29300	0.02491
29201-29800	29500	0.01972
29401-30000	29700	0.01735
29601-30200	29900	0.01401
29801-30400	30100	0.01078
30001-30600	30300	0.00837
30201-30800	30500	0.00928
30401-31000	30700	0.01063
30601-31200	30900	0.01391
30801-31400	31100	0.01911
31001-31600	31300	0.02685
31201-31800	31500	0.02748
31401-32000	31700	0.02047
31601-32200	31900	0.01498
31801-32400	32100	0.01006
32001-32600	32300	0.01062
32201-32800	32500	0.00946
32401-33000	32700	0.01044
32601-33200	32900	0.00877
32801-33400	33100	0.00863
33001-33600	33300	0.01085
33201-33800	33500	0.01222
33401-34000	33700	0.01303
33601-34200	33900	0.01593
33801-34400	34100	0.01715
34001-34600	34300	0.0185
34201-34800	34500	0.0169
34401-35000	34700	0.01673
34601-35200	34900	0.01397
34801-35400	35100	0.01001
35001-35600	35300	0.00758
35201-35800	35500	0.01341
35401-36000	35700	0.0176
35601-36200	35900	0.02125
35801-36400	36100	0.01434
36001-36600	36300	0.01869
36201-36800	36500	0.02759
36401-37000	36700	0.03525
36601-37200	36900	0.03852
36801-37400	37100	0.02872
37001-37600	37300	0.02412
37201-37800	37500	0.02001
37401-38000	37700	0.02617
37601-38200	37900	0.02991
37801-38400	38100	0.02574
38001-38600	38300	0.01727
38201-38800	38500	0.01374
38401-39000	38700	0.016
38601-39200	38900	0.02326
38801-39400	39100	0.02475
39001-39600	39300	0.02784
39201-39800	39500	0.02784
39401-40000	39700	0.02753
39601-40200	39900	0.02182
39801-40400	40100	0.02019
40001-40600	40300	0.02061
40201-40800	40500	0.01854
40401-41000	40700	0.01223
40601-41200	40900	0.01146
40801-41400	41100	0.01707
41001-41600	41300	0.02603
41201-41800	41500	0.02337
41401-42000	41700	0.02393
41601-42200	41900	0.02657
41801-42400	42100	0.03028
42001-42600	42300	0.02312
42201-42800	42500	0.01332
42401-43000	42700	0.00874
42601-43200	42900	0.00965
42801-43400	43100	0.00854
43001-43600	43300	0.0089
43201-43800	43500	0.00915
43401-44000	43700	0.00946
43601-44200	43900	0.00989
43801-44400	44100	0.00818
44001-44600	44300	0.00742
44201-44800	44500	0.00426
44401-45000	44700	0.00422
44601-45200	44900	0.00349
44801-45400	45100	0.00662
45001-45600	45300	0.00781
45201-45800	45500	0.0107
45401-46000	45700	0.00897
45601-46200	45900	0.00981
45801-46400	46100	0.00839
46001-46600	46300	0.00912
46201-46800	46500	0.00604
46401-47000	46700	0.01214
46601-47200	46900	0.01725
46801-47400	47100	0.02205
47001-47600	47300	0.02186
47201-47800	47500	0.02492
47401-48000	47700	0.03196
47601-48200	47900	0.02471
47801-48400	48100	0.02465
48001-48600	48300	0.01633
48201-48800	48500	0.02645
48401-49000	48700	0.01922
48601-49200	48900	0.01801
48801-49400	49100	0.01121
49001-49600	49300	0.01252
49201-49800	49500	0.01238
49401-50000	49700	0.01046
49601-50200	49900	0.0091
49801-50400	50100	0.00763
50001-50600	50300	0.00856
50201-50800	50500	0.00749
50401-51000	50700	0.00933
50601-51200	50900	0.00881
50801-51400	51100	0.01419
51001-51600	51300	0.0196
51201-51800	51500	0.03027
51401-52000	51700	0.03298
51601-52200	51900	0.0344
51801-52400	52100	0.03707
52001-52600	52300	0.04443
52201-52800	52500	0.0481
52401-53000	52700	0.04197
52601-53200	52900	0.03352
52801-53400	53100	0.03108
53001-53600	53300	0.03304
53201-53800	53500	0.03425
53401-54000	53700	0.04178
53601-54200	53900	0.04047
53801-54400	54100	0.04023
54001-54600	54300	0.02745
54201-54800	54500	0.02397
54401-55000	54700	0.02375
54601-55200	54900	0.0221
54801-55400	55100	0.02272
55001-55600	55300	0.01816
55201-55800	55500	0.02057
55401-56000	55700	0.01946
55601-56200	55900	0.02037
55801-56400	56100	0.01919
56001-56600	56300	0.01499
56201-56800	56500	0.01832
56401-57000	56700	0.02497
56601-57200	56900	0.03241
56801-57400	57100	0.03235
57001-57600	57300	0.0338
57201-57800	57500	0.02976
57401-58000	57700	0.03082
57601-58200	57900	0.02646
57801-58400	58100	0.03051
58001-58600	58300	0.02971
58201-58800	58500	0.02927
58401-59000	58700	0.03179
58601-59200	58900	0.03338
58801-59400	59100	0.03455
59001-59600	59300	0.02722
59201-59800	59500	0.02485
59401-60000	59700	0.02353
59601-60200	59900	0.02325
59801-60400	60100	0.02113
60001-60600	60300	0.01388
60201-60800	60500	0.01173
60401-61000	60700	0.00909
60601-61200	60900	0.01152
60801-61400	61100	0.01069
61001-61600	61300	0.00998
61201-61800	61500	0.01243
61401-62000	61700	0.02085
61601-62200	61900	0.02148
61801-62400	62100	0.02199
62001-62600	62300	0.01628
62201-62800	62500	0.0214
62401-63000	62700	0.01902
62601-63200	62900	0.02155
62801-63400	63100	0.01816
63001-63600	63300	0.02318
63201-63800	63500	0.01895
63401-64000	63700	0.01735
63601-64200	63900	0.02005
63801-64400	64100	0.02401
64001-64600	64300	0.03151
64201-64800	64500	0.0311
64401-65000	64700	0.03716
64601-65200	64900	0.03997
64801-65400	65100	0.04181
65001-65600	65300	0.03623
65201-65800	65500	0.0229
65401-66000	65700	0.0128
65601-66200	65900	0.00933
65801-66400	66100	0.01137
66001-66600	66300	0.01287
66201-66800	66500	0.01116
66401-67000	66700	0.01223
66601-67200	66900	0.01497
66801-67400	67100	0.02184
67001-67600	67300	0.02639
67201-67800	67500	0.02208
67401-68000	67700	0.02015
67601-68200	67900	0.01366
67801-68400	68100	0.02013
68001-68600	68300	0.01874
68201-68800	68500	0.0231
68401-69000	68700	0.01811
68601-69200	68900	0.02184
68801-69400	69100	0.02129
69001-69600	69300	0.0241
69201-69800	69500	0.02445
69401-70000	69700	0.02636
69601-70200	69900	0.041
69801-70400	70100	0.04596
70001-70600	70300	0.05668
70201-70800	70500	0.04637
70401-71000	70700	0.03613
70601-71200	70900	0.01857
70801-71400	71100	0.00903
71001-71600	71300	0.00698
71201-71800	71500	0.00757
71401-72000	71700	0.00719
71601-72200	71900	0.00975
71801-72400	72100	0.00921
72001-72600	72300	0.00962
72201-72800	72500	0.00612
72401-73000	72700	0.01392
72601-73200	72900	0.01724
72801-73400	73100	0.01937
73001-73600	73300	0.01173
73201-73800	73500	0.01348
73401-74000	73700	0.01875
73601-74200	73900	0.01886
73801-74400	74100	0.01837
74001-74600	74300	0.02058
74201-74800	74500	0.02874
74401-75000	74700	0.03385
74601-75200	74900	0.02464
74801-75400	75100	0.01594
75001-75600	75300	0.00588
75201-75800	75500	0.01093
75401-76000	75700	0.02042
75601-76200	75900	0.02078
75801-76400	76100	0.01679
76001-76600	76300	0.00684
76201-76800	76500	0.00963
76401-77000	76700	0.02063
76601-77200	76900	0.03851
76801-77400	77100	0.0343
77001-77600	77300	0.02147
77201-77800	77500	0.0087
77401-78000	77700	0.01265
77601-78200	77900	0.01659
77801-78400	78100	0.01406
78001-78600	78300	0.01587
78201-78800	78500	0.01834
78401-79000	78700	0.01988
78601-79200	78900	0.02173
78801-79400	79100	0.02223
79001-79600	79300	0.0222
79201-79800	79500	0.0194
79401-80000	79700	0.01494
79601-80200	79900	0.01444
79801-80400	80100	0.01496
80001-80600	80300	0.01324
80201-80800	80500	0.01351
80401-81000	80700	0.01181
80601-81200	80900	0.01332
80801-81400	81100	0.01269
81001-81600	81300	0.0137
81201-81800	81500	0.01422
81401-82000	81700	0.01375
81601-82200	81900	0.00983
81801-82400	82100	0.00706
82001-82600	82300	0.00508
82201-82800	82500	0.00377
82401-83000	82700	0.00628
82601-83200	82900	0.00741
82801-83400	83100	0.01024
83001-83600	83300	0.01197
83201-83800	83500	0.01322
83401-84000	83700	0.01461
83601-84200	83900	0.01165
83801-84400	84100	0.01351
84001-84600	84300	0.01052
84201-84800	84500	0.00898
84401-85000	84700	0.0093
84601-85200	84900	0.00997
84801-85400	85100	0.01368
85001-85600	85300	0.00982
85201-85800	85500	0.01157
85401-86000	85700	0.01097
85601-86200	85900	0.01275
85801-86400	86100	0.01381
86001-86600	86300	0.01525
86201-86800	86500	0.01533
86401-87000	86700	0.01429
86601-87200	86900	0.01262
86801-87400	87100	0.01334
87001-87600	87300	0.01495
87201-87800	87500	0.02114
87401-88000	87700	0.02546
87601-88200	87900	0.02523
87801-88400	88100	0.02453
88001-88600	88300	0.02146
88201-88800	88500	0.03028
88401-89000	88700	0.02615
88601-89200	88900	0.02839
88801-89400	89100	0.02385
89001-89600	89300	0.02705
89201-89800	89500	0.02091
89401-90000	89700	0.01993
89601-90200	89900	0.01966
89801-90400	90100	0.02882
90001-90600	90300	0.03256
90201-90800	90500	0.04183
90401-91000	90700	0.04127
90601-91200	90900	0.0393
90801-91400	91100	0.02411
91001-91600	91300	0.01559
91201-91800	91500	0.00628
91401-92000	91700	0.01409
91601-92200	91900	0.02277
91801-92400	92100	0.02733
92001-92600	92300	0.02057
92201-92800	92500	0.01195
92401-93000	92700	0.0118
92601-93200	92900	0.01223
92801-93400	93100	0.02041
93001-93600	93300	0.02011
93201-93800	93500	0.02139
93401-94000	93700	0.01879
93601-94200	93900	0.02253
93801-94400	94100	0.02549
94001-94600	94300	0.0176
94201-94800	94500	0.00902
94401-95000	94700	0.00509
94601-95200	94900	0.008
94801-95400	95100	0.00953
95001-95600	95300	0.0068
95201-95800	95500	0.00646
95401-96000	95700	0.00796
95601-96200	95900	0.01004
95801-96400	96100	0.00954
96001-96600	96300	0.00603
96201-96800	96500	0.00323
96401-97000	96700	0.00116
96601-97200	96900	0.00116
96801-97400	97100	0.00041
97001-97600	97300	0.00041
97201-97800	97500	0.00017
97401-98000	97700	0.00094
97601-98200	97900	0.00188
97801-98400	98100	0.00526
98001-98600	98300	0.00489
98201-98800	98500	0.00621
98401-99000	98700	0.00469
98601-99200	98900	0.0065
98801-99400	99100	0.00491
99001-99600	99300	0.00328
99201-99800	99500	0.00295
99401-100000	99700	0.0042
99601-100200	99900	0.00602
99801-100400	100100	0.00611
100001-100600	100300	0.01747
100201-100800	100500	0.02
100401-101000	100700	0.02069
100601-101200	100900	0.00748
100801-101400	101100	0.00442
101001-101600	101300	0.00169
101201-101800	101500	0.0016
101401-102000	101700	0
101601-102200	101900	0.00016
101801-102400	102100	0.0008
102001-102600	102300	0.00354
102201-102800	102500	0.00338
102401-103000	102700	0.00274
102601-103200	102900	8e-05
102801-103400	103100	8e-05
103001-103600	103300	8e-05
103201-103800	103500	8e-05
103401-104000	103700	0.00055
103601-104200	103900	0.00187
103801-104400	104100	0.00296
104001-104600	104300	0.00389
104201-104800	104500	0.00301
104401-105000	104700	0.00333
104601-105200	104900	0.00279
104801-105400	105100	0.00378
105001-105600	105300	0.00355
105201-105800	105500	0.00445
105401-106000	105700	0.00429
105601-106200	105900	0.00456
105801-106400	106100	0.00659
106001-106600	106300	0.00614
106201-106800	106500	0.00521
106401-107000	106700	0.00349
106601-107200	106900	0.00307
106801-107400	107100	0.00247
107001-107600	107300	0.0004
107201-107800	107500	0.0006
107401-108000	107700	0.00093
107601-108200	107900	0.00093
107801-108400	108100	0.00208
108001-108600	108300	0.00646
108201-108800	108500	0.01057
108401-109000	108700	0.00975
108601-109200	108900	0.00823
108801-109400	109100	0.00645
109001-109600	109300	0.01237
109201-109800	109500	0.01417
109401-110000	109700	0.01696
109601-110200	109900	0.02045
109801-110400	110100	0.01821
110001-110600	110300	0.01569
110201-110800	110500	0.00923
110401-111000	110700	0.01238
110601-111200	110900	0.016
110801-111400	111100	0.01584
111001-111600	111300	0.01733
111201-111800	111500	0.01535
111401-112000	111700	0.01594
111601-112200	111900	0.01223
111801-112400	112100	0.01375
112001-112600	112300	0.01963
112201-112800	112500	0.02807
112401-113000	112700	0.0307
112601-113200	112900	0.02577
112801-113400	113100	0.01862
113001-113600	113300	0.01543
113201-113800	113500	0.01407
113401-114000	113700	0.01526
113601-114200	113900	0.02377
113801-114400	114100	0.02949
114001-114600	114300	0.03132
114201-114800	114500	0.02166
114401-115000	114700	0.02111
114601-115200	114900	0.0256
114801-115400	115100	0.02851
115001-115600	115300	0.02427
115201-115800	115500	0.01901
115401-116000	115700	0.0208
115601-116200	115900	0.021
115801-116400	116100	0.02375
116001-116600	116300	0.02113
116201-116800	116500	0.01897
116401-117000	116700	0.01529
116601-117200	116900	0.01033
116801-117400	117100	0.01153
117001-117600	117300	0.00691
117201-117800	117500	0.00807
117401-118000	117700	0.00727
117601-118200	117900	0.00853
117801-118400	118100	0.00887
118001-118600	118300	0.01045
118201-118800	118500	0.00994
118401-119000	118700	0.01201
118601-119200	118900	0.01136
118801-119400	119100	0.01676
119001-119600	119300	0.01415
119201-119800	119500	0.01282
119401-120000	119700	0.00949
119601-120200	119900	0.0125
119801-120400	120100	0.01125
120001-120600	120300	0.00909
120201-120800	120500	0.01065
120401-121000	120700	0.01319
120601-121200	120900	0.01394
120801-121400	121100	0.01223
121001-121600	121300	0.01248
121201-121800	121500	0.01265
121401-122000	121700	0.01689
121601-122200	121900	0.01802
121801-122400	122100	0.01637
122001-122600	122300	0.02232
122201-122800	122500	0.02167
122401-123000	122700	0.02244
122601-123200	122900	0.01054
122801-123400	123100	0.00824
123001-123600	123300	0.00803
123201-123800	123500	0.01003
123401-124000	123700	0.01067
123601-124200	123900	0.02063
123801-124400	124100	0.02556
124001-124600	124300	0.02516
124201-124800	124500	0.01788
124401-125000	124700	0.00912
124601-125200	124900	0.01001
124801-125400	125100	0.02415
125001-125600	125300	0.02858
125201-125800	125500	0.03582
125401-126000	125700	0.02894
125601-126200	125900	0.04577
125801-126400	126100	0.04972
126001-126600	126300	0.04496
126201-126800	126500	0.0358
126401-127000	126700	0.02907
126601-127200	126900	0.02609
126801-127400	127100	0.02125
127001-127470	127235	0.02262
